# Supplementary material for: Programmed Hydrolysis in Designing Paclitaxel Prodrug for Nanocarrier Assembly
Source: PubMed Central journal article supplement (PMC4499798; doi:10.1038/srep12023), 2015-07-13
Supplement: srep12023-s1.pdf [file srep12023-s1.pdf]

## Supplementary Material for

# Programmed Hydrolysis in Designing Paclitaxel Prodrug for Nanocarrier Assembly

Fu Q.<sup>1</sup>, Wang Y.<sup>1,\*</sup>, Ma Y.<sup>4</sup>, Zhang D.<sup>1</sup>, Fallon J.<sup>3</sup>, Yang X.<sup>1</sup>, Liu D.<sup>2,\*</sup>, He Z.<sup>1</sup>, Liu F.<sup>3,§</sup>

### ***Affiliations:***

<sup>1</sup>School of Pharmacy, and <sup>2</sup>Key Laboratory of Structure-Based Drug Design and Discovery, Ministry of Education, Shenyang Pharmaceutical University, Shenyang 110016, China

<sup>3</sup>Division of Molecular Pharmaceutics, Eshelman School of Pharmacy, University of North Carolina at Chapel Hill, Chapel Hill, NC 27599, USA.

<sup>4</sup>School of Chinese Materia Medica, Guangzhou University of Chinese Medicine, Guangzhou 510006, China.

**\*Corresponding Authors: Yongjun Wang Ph.D. and Dan Liu Ph.D.**

Phone: +86-24-23986325. Fax: +86-24-23986325

E-mail: (Y.W.) i\_maple@163.com, (D.L.) sammyld@163.com

§ Deceased

≡ This paper is dedicated to the memory of Professor Feng Liu, PhD, 1955-2014  
University of North Carolina at Chapel Hill

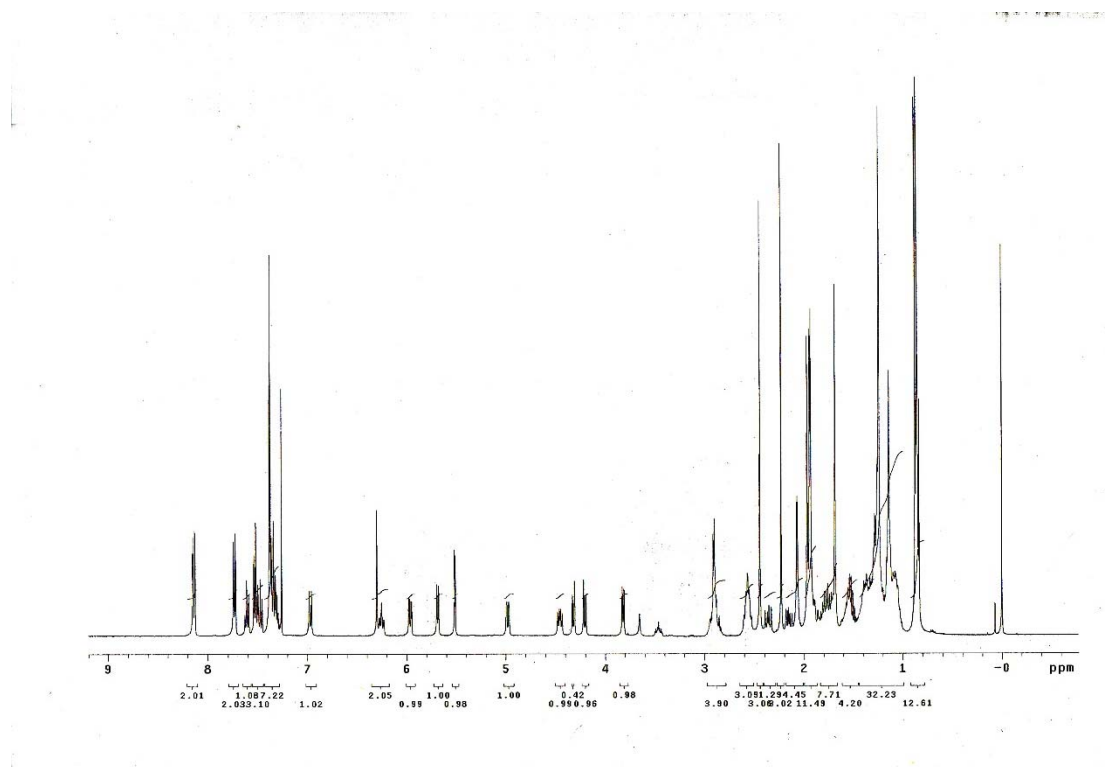

Fig. S1. <sup>1</sup>H NMR (400 MHz) spectrum of PTX-Ve in D<sub>2</sub>O at 25°C.

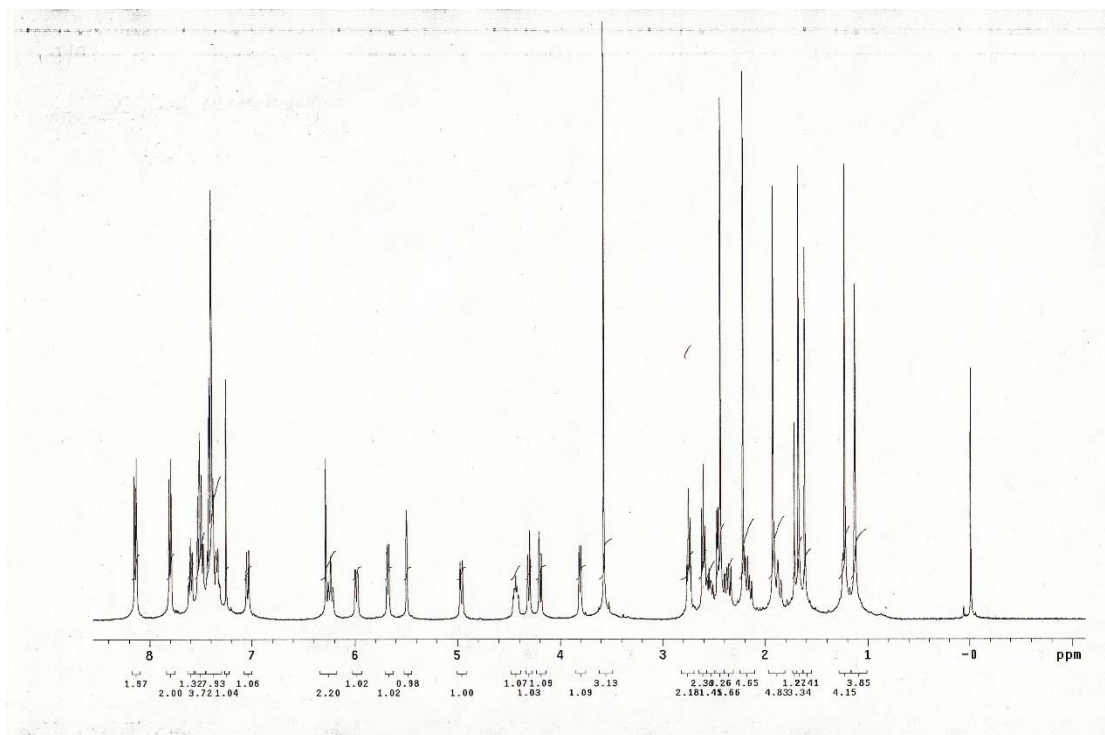

Fig. S2.  $^1\text{H}$  NMR (400 MHz) spectrum of PTX-SEE in  $\text{D}_2\text{O}$  at  $25^\circ\text{C}$ .

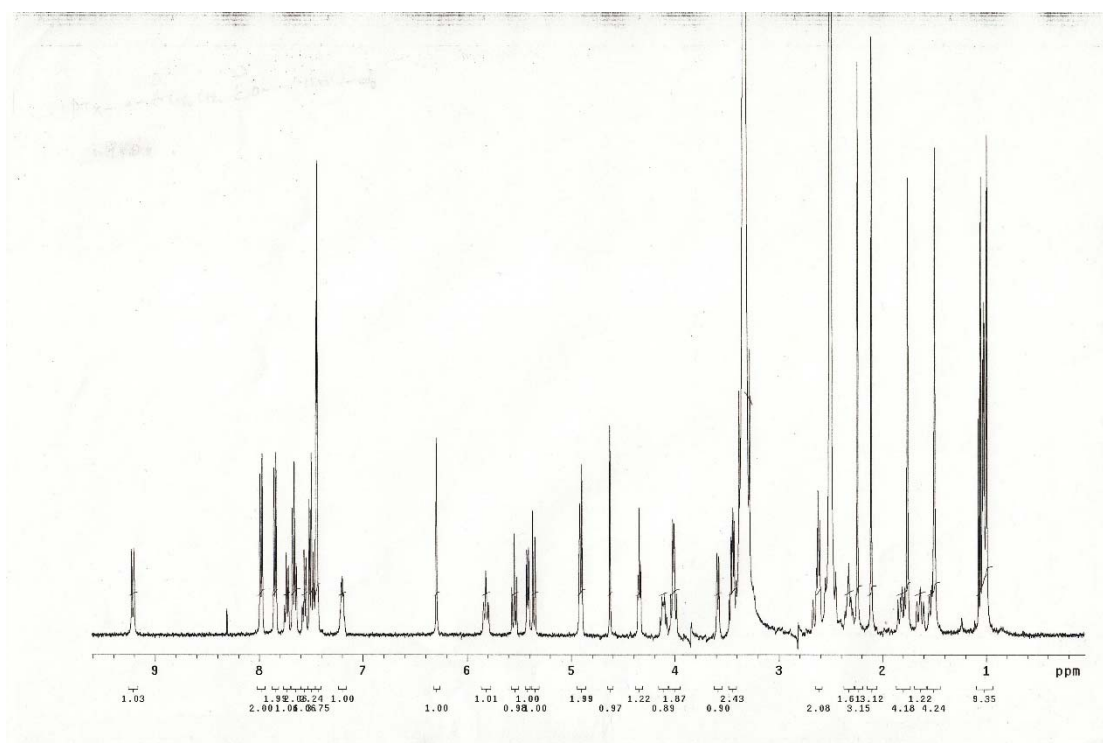

Fig. S3. <sup>1</sup>H NMR (400 MHz) spectrum of PTX-SA in D<sub>2</sub>O at 25°C.

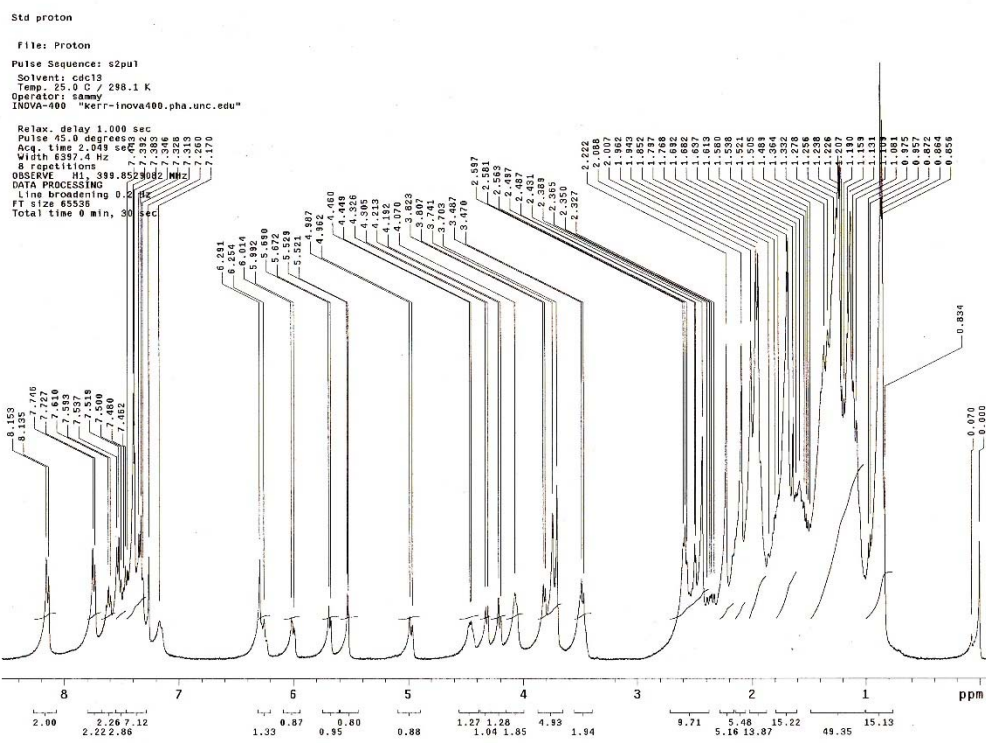

Fig. S4. <sup>1</sup>H NMR (400 MHz) spectrum of PTX-S-S-Ve in D<sub>2</sub>O at 25°C.

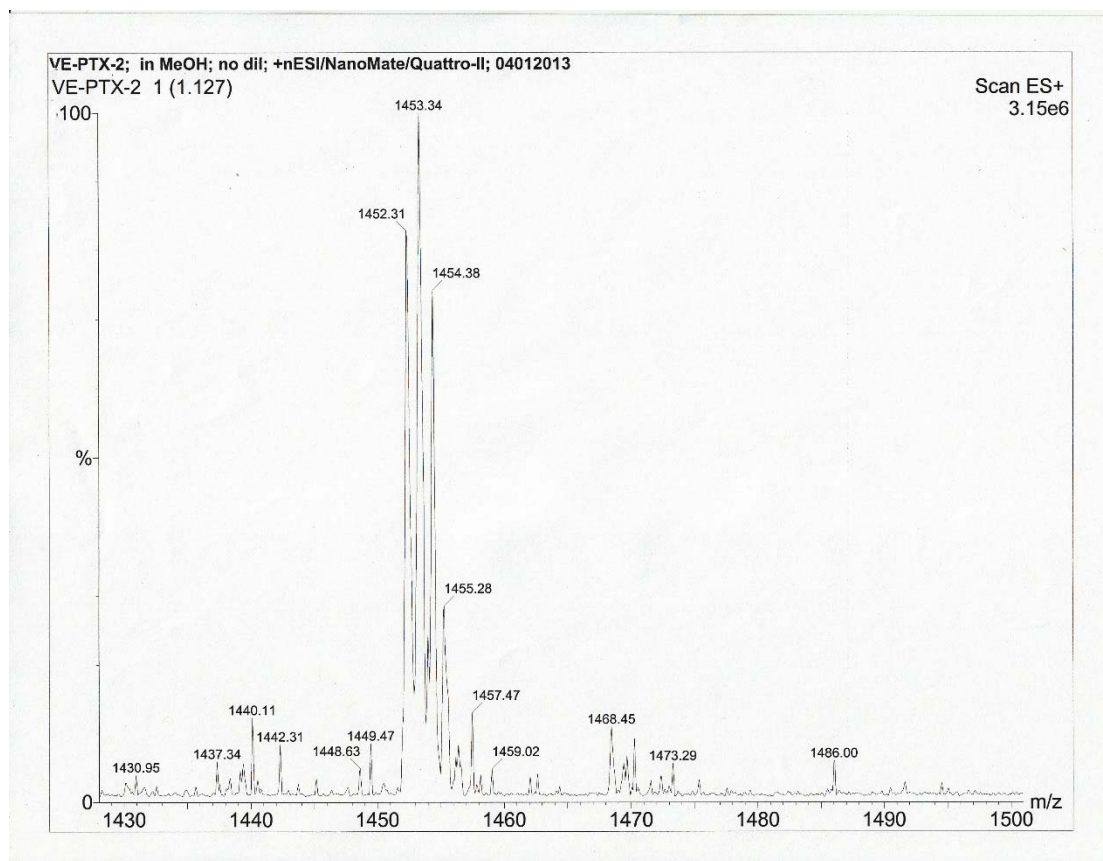

Fig. S5. ESI mass spectrum of PTX-S-S-Ve.

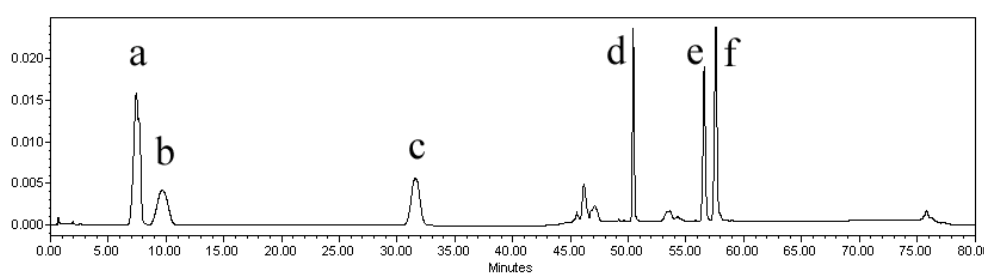

Fig. S6. Chromatogram for PTX and its prodrugs. The retention time was 6.70, 9.29, 31.67, 50.98, 57.72 and 58.83 min for PTX-SA (a), PTX (b), PTX-SEE (c), PTX-C16-Br<sub>2</sub> (d), PTX-Ve (e), and PTX-S-S-Ve (f), respectively.

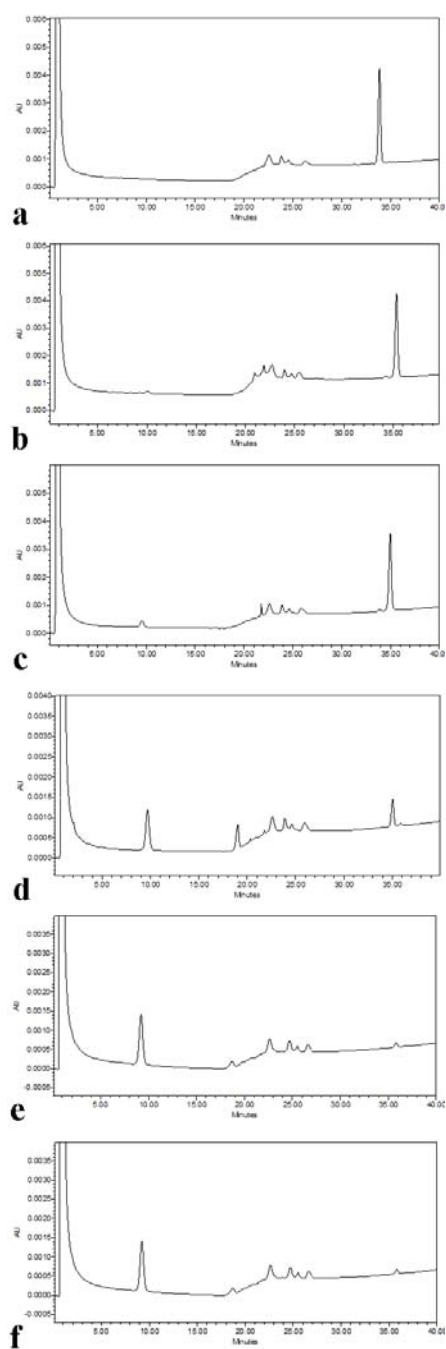

Fig. S7. Chromatograms for PTX-VE (a), and PTX-S-S-VE after the treatment of glutathione at 0 h (b), 4 h (c), 8 h (d), 24 h (e), and 48 h (f) below. The retention time was 9.3, 34.0, and 35.2 min for PTX, PTX-VE, and PTX-S-S-VE, respectively.



Sample Name: PTX-Ve emulsion 1  
SOP Name: mansettings.nano  
File Name: QIANG FU.dts  
Record Number: 10  
Material RI: 1.59  
Material Absorbtion: 0.01  
Dispersant Name: Water  
Dispersant RI: 1.330  
Viscosity (cP): 0.8872  
Measurement Date and Time: Friday, August 09, 2013 3:17:54 PM

Temperature (°C): 25.0  
Count Rate (kcps): 486.4  
Cell Description: Disposable sizing cuvette  
Duration Used (s): 60  
Measurement Position (mm): 1.05  
Attenuator: 4

|                         | Size (d.nm):  | % Intensity | Width (d.nm): |
|-------------------------|---------------|-------------|---------------|
| Z-Average (d.nm): 135.2 | Peak 1: 164.7 | 100.0       | 76.56         |
| PdI: 0.161              | Peak 2: 0.000 | 0.0         | 0.000         |
| Intercept: 0.919        | Peak 3: 0.000 | 0.0         | 0.000         |

Result quality : **Good**

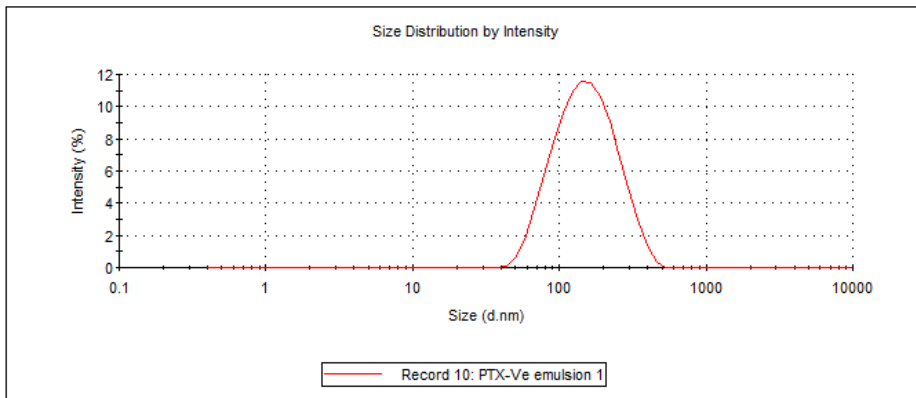

Fig. S8. Particle size distribution for PTX-Ve/Ve NES.

**Sample Name:** PTX-S-S-Ve emulsion 3  
**SOP Name:** mansettings.nano  
**File Name:** QIANG FU.dts  
**Record Number:** 15  
**Material RI:** 1.59  
**Material Absorbtion:** 0.01  
**Dispersant Name:** Water  
**Dispersant RI:** 1.330  
**Viscosity (cP):** 0.8872  
**Measurement Date and Time:** Friday, August 09, 2013 3:35:54 PM

**Temperature (°C):** 25.0  
**Count Rate (kcps):** 464.4  
**Cell Description:** Disposable sizing cuvette  
**Duration Used (s):** 60  
**Measurement Position (mm):** 1.05  
**Attenuator:** 4

|                                | Size (d.nm):         | % Intensity | Width (d.nm): |
|--------------------------------|----------------------|-------------|---------------|
| <b>Z-Average (d.nm):</b> 128.3 | <b>Peak 1:</b> 151.0 | 100.0       | 63.46         |
| <b>Pdl:</b> 0.138              | <b>Peak 2:</b> 0.000 | 0.0         | 0.000         |
| <b>Intercept:</b> 0.923        | <b>Peak 3:</b> 0.000 | 0.0         | 0.000         |

**Result quality :** Good

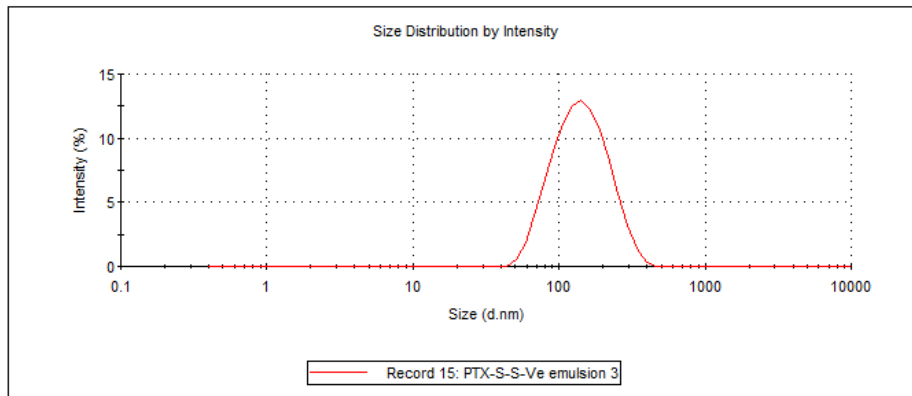

Fig. S9. Particle size distribution for PTX-S-S-Ve/Ve NES.

**Table S1.** The stability evaluation for PTX-S-S-VE/VE NES

| Time (month) | Physical appearance | Z-average (nm) | PDI           | EE (%)     |
|--------------|---------------------|----------------|---------------|------------|
| 0            | Good                | 128.1 ± 0.4    | 0.175 ± 0.012 | 98.7 ± 0.3 |
| 1            | Good                | 134.6 ± 1.8    | 0.189 ± 0.021 | 98.1 ± 0.3 |
| 2            | Good                | 129.4 ± 3.2    | 0.180 ± 0.017 | 98.9 ± 0.4 |
| 3            | Good                | 126.5 ± 0.9    | 0.174 ± 0.009 | 98.7 ± 0.3 |
| 6            | Good                | 130.9 ± 1.1    | 0.181 ± 0.011 | 98.6 ± 0.2 |
| 12           | Good                | 134.1 ± 2.0    | 0.181 ± 0.021 | 98.1 ± 0.4 |

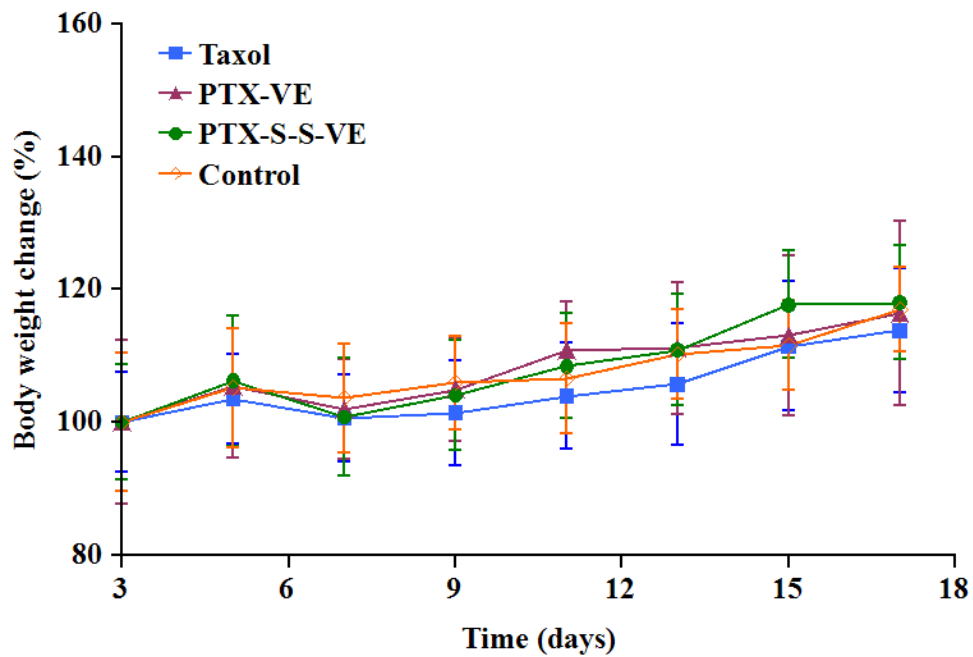

Fig. S10. Body weight change for the nude mice over 18 days after tumor inoculation treated with Taxol<sup>®</sup>, PTX-VE/VE NES, PTX-S-S-VE/VE NES, and saline. The formulations were administered intravenously at an equivalent dose of 5 mg/kg of PTX every second day for 5 injections in total (data are expressed as the mean  $\pm$  SD, n=5 mice for each formulation).

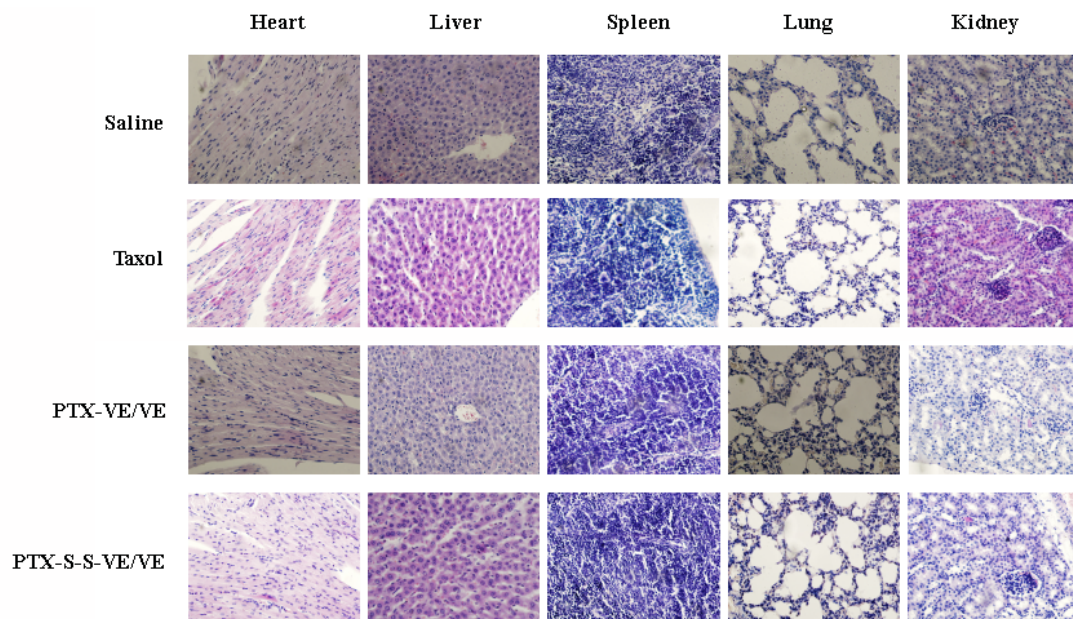

Fig. S11. Typical histopathologic images of hearts, liver, spleen, lung, and kidney after treatment with saline, Taxol<sup>®</sup>, PTX-VE/VE NES and PTX-S-S-VE/VE NES. The formulations were administered intravenously at an equivalent dose of 5 mg/kg of PTX every second day for 5 injections in total (data are expressed as the mean  $\pm$  SD, n=5 mice for each formulation).
